# Supplementary material for: Comparison of Growth Velocity Among School Age Children With Different Body Mass Index From Childhood Into Early Adolescence in Hualien County, Taiwan: A Retrospective Cohort Study
Source: Frontiers journal article supplement (doi:10.3389/fped.2021.599730), 2021-02-12

Supplementary Table 1. Demographic characteristics of the subjects (N = 1,637)

| Variable               | 2009 (6 to 7 years of age) |
|------------------------|----------------------------|
| N                      | 1,637                      |
| Age in 2009            |                            |
| (mean $\pm$ SD; median | 6.40 $\pm$ 0.50            |
| (lower quartile, upper | 6.00 (6.00, 7.00)          |
| quartile), y)          |                            |
| Sex                    |                            |
| Female, n (%)          | 770 (47.0)                 |
| Male, n (%)            | 867 (53.0)                 |
| Urbanization           |                            |
| Urban, n (%)           | 1,192 (72.8)               |
| Suburban, n (%)        | 336 (20.5)                 |
| Rural, n (%)           | 109 (6.7)                  |
| Aborigine              |                            |
| No, n (%)              | 834 (73.2)                 |
| Yes, n (%)             | 306 (26.8)                 |
| BMI group              |                            |
| Underweight, n (%)     | 65 (4.0)                   |
| Normal, n (%)          | 1,353 (82.7)               |
| Overweight, n (%)      | 41 (2.5)                   |
| Obese, n (%)           | 178 (10.9)                 |

SD = standard deviation

BMI= Body mass index

Supplementary Table 2. Demographic characteristics of the subjects (N=1,637)

| Variable                 | 2009 (6 to 7 years of age) | 2012 (9 to 10 years of age) | 2015 (12 to 13 years of age) |
|--------------------------|----------------------------|-----------------------------|------------------------------|
| Overall height (cm)      | 117.59 ± 5.21              | 134.99 ± 6.56               | 154.45 ± 7.47                |
|                          | 117.50 (114.00, 121.00)    | 134.50 (130.35, 139.50)     | 154.20 (149.50, 159.20)      |
| Female height (cm)       | 117.28 ± 5.18              | 135.38 ± 6.79               | 154.02 ± 6.03                |
|                          | 117.45 (114.00, 120.80)    | 135.00 (130.70, 140.00)     | 154.10 (150.10, 157.90)      |
| Male height (cm)         | 117.87 ± 5.23              | 134.65 ± 6.33               | 154.84 ± 8.53                |
|                          | 117.50 (114.10, 121.30)    | 134.20 (130.00, 139.00)     | 154.50 (148.50, 161.00)      |
| Overall weight (kg)      | 22.23 ± 4.85               | 32.04 ± 8.73                | 46.62 ± 12.44                |
|                          | 21.10 (19.30, 23.30)       | 29.70 (26.70, 33.70)        | 43.80 (39.15, 49.40)         |
| Female weight (kg)       | 21.72 ± 4.56               | 31.55 ± 8.24                | 45.90 ± 11.07                |
|                          | 20.85 (19.00, 22.92)       | 29.55 (26.50, 33.40)        | 43.50 (39.80, 48.40)         |
| Male weight (kg)         | 22.68 ± 5.05               | 32.47 ± 9.13                | 47.26 ± 13.52                |
|                          | 21.40 (19.70, 23.80)       | 29.80 (27.00, 34.00)        | 44.00 (38.80, 50.60)         |
| BMI (kg/m <sup>2</sup> ) | 15.97 ± 2.52               | 17.39 ± 3.50                | 19.37 ± 4.08                 |
|                          | 15.35 (14.61, 16.30)       | 16.38 (15.36, 17.85)        | 18.41 (17.02, 20.05)         |

Values are presented as mean ± standard deviation with median (lower quartile, upper quartile).

SD = standard deviation

BMI= Body mass index

Supplementary Table 3. Results of repeated measures analysis of variance in male subjects (N=867)

| Variable    | Source of Variation             | df  | SS       | MS      | F       | P-value |
|-------------|---------------------------------|-----|----------|---------|---------|---------|
| Height gain | Between subjects                | 866 | 1298.471 |         |         |         |
|             | Treatment                       | 3   | 57.975   | 19.325  | 13.444  | <0.001* |
|             | Error subjects within treatment | 863 | 1240.496 | 1.437   |         |         |
|             | Within Subjects                 | 866 | 1082.674 |         |         |         |
|             | Time                            | 1   | 80.988   | 80.988  | 71.520  | <0.001* |
|             | Treatment X Time                | 3   | 24.442   | 8.147   | 7.195   | <0.001* |
|             | Error                           | 863 | 977.244  | 1.132   |         |         |
|             | Total                           | 866 | 2381.145 |         |         |         |
|             |                                 |     |          |         |         |         |
| Weight gain | Between subjects                | 866 | 4093.964 |         |         |         |
|             | Treatment                       | 3   | 2548.674 | 849.558 | 474.454 | <0.001* |
|             | Error subjects within treatment | 863 | 1545.290 | 1.791   |         |         |
|             | Within Subjects                 | 866 | 1111.601 |         |         |         |
|             | Time                            | 1   | 194.680  | 194.680 | 185.147 | <0.001* |
|             | Treatment X Time                | 3   | 9.489    | 3.163   | 3.008   | <0.001* |
|             | Error                           | 863 | 907.432  | 1.051   |         |         |
|             | Total                           | 866 | 5205.565 |         |         |         |
|             |                                 |     |          |         |         |         |

\*p-value <0.05

SS = sum of squares, MS = mean of squares, df = degree of freedom

Supplementary Table 4. Results of repeated measures analysis of variance in female subjects (N=770)

| Variable    | Source of Variation             | df  | SS       | MS      | F       | P-value |
|-------------|---------------------------------|-----|----------|---------|---------|---------|
| Height gain | Between subjects                | 769 | 540.357  |         |         |         |
|             | Treatment                       | 3   | 4.557    | 1.519   | 2.172   | 0.090   |
|             | Error subjects within treatment | 766 | 535.800  | 0.699   |         |         |
|             | Within Subjects                 | 769 | 1517.502 |         |         |         |
|             | Time                            | 1   | 14.560   | 14.560  | 8.434   | 0.004*  |
|             | Treatment X Time                | 3   | 180.511  | 60.170  | 34.853  | <0.001* |
|             | Error                           | 766 | 1322.431 | 1.726   |         |         |
|             | Total                           | 769 | 2057.859 |         |         |         |
|             |                                 |     |          |         |         |         |
| Weight gain | Between subjects                | 769 | 2271.733 |         |         |         |
|             | Treatment                       | 3   | 1336.727 | 445.576 | 365.036 | <0.001* |
|             | Error subjects within treatment | 766 | 935.006  | 1.221   |         |         |
|             | Within Subjects                 | 769 | 989.191  |         |         |         |
|             | Time                            | 1   | 71.002   | 71.002  | 62.557  | <0.001* |
|             | Treatment X Time                | 3   | 48.776   | 16.259  | 14.325  | <0.001* |
|             | Error                           | 766 | 869.413  | 1.135   |         |         |
|             | Total                           | 769 | 3260.924 |         |         |         |
|             |                                 |     |          |         |         |         |

\*p-value <0.05

SS = sum of squares, MS = mean of squares, df = degree of freedom

## Supplementary figure 1: Physical measurements and change between the male and female groups

(A) Average height in 6 to 7-year-old, 9 to 10-year-old, and 12 to 13-year-old

(B) Annual height gain in 6 to 9-year-old, 9 to 13-year-old, and 6 to 13-year-old

(C) Average weight in 6 to 7-year-old, 9 to 10-year-old, and 12 to 13-year-old

(D) Annual weight gain in 6 to 9-year-old, 9 to 13-year-old, and 6 to 13-year-old

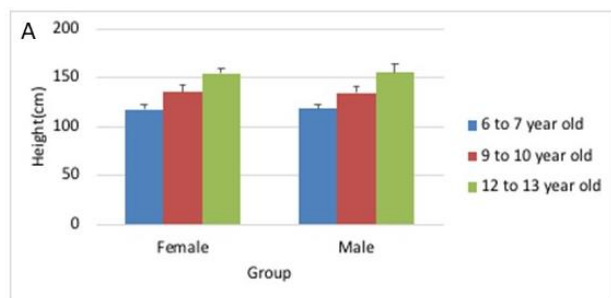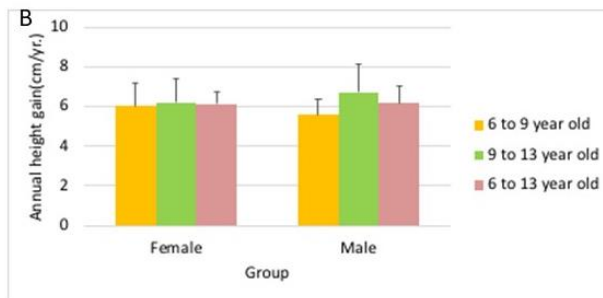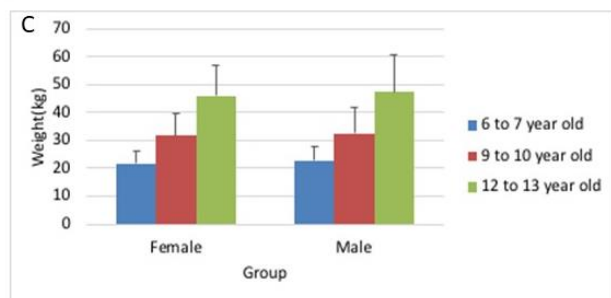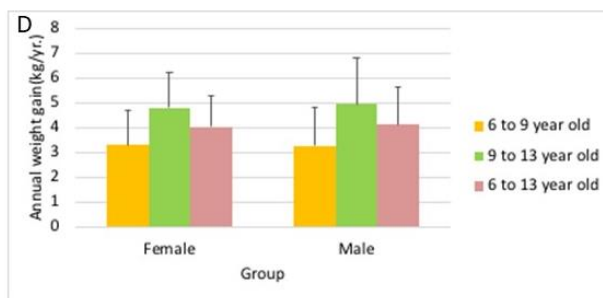

Supplement: Data_Sheet_1.PDF [file Data_Sheet_1.PDF]
